# Supplementary material for: Controlled Synthesis of Platinum and Silver Nanoparticles Using Multivalent Ligands
Source: MDPI journal article supplement (doi:10.3390/nano12132294), 2022-07-04
Supplement: s1 [file s1]

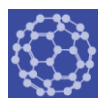

## Article

# Controlled Synthesis of Platinum and Silver Nanoparticles Using Multivalent Ligands

Suguna Perumal <sup>1,2,†</sup>, Raji Atchudan <sup>3,†</sup>, Eckart Rühl <sup>1,\*</sup> and Christina Graf <sup>1,4,\*</sup>

<sup>1</sup> Physikalische Chemie, Institut für Chemie und Biochemie, Freie Universität Berlin, 14195 Berlin, Germany; suguna.perumal@gmail.com

<sup>2</sup> Department of Chemistry, Sejong University, Seoul 143-747, Korea

<sup>3</sup> School of Chemical Engineering, Yeungnam University, Gyeongsan 38541, Korea; atchudanr@yu.ac.kr

<sup>4</sup> Department of Chemistry and Biotechnology, Darmstadt University of Applied Sciences, 64295 Darmstadt, Germany

\* Correspondence: ruehl@zedat.fu-berlin.de (E.R.); christina.graf@h-da.de (C.G.)

† These authors contributed equally to this work.

## Characterization of flexible amine-functionalized multivalent ligands

### Divalent Amine:

**NMR-<sup>1</sup>H (400 MHz, CDCl<sub>3</sub>)**  $\delta$ : 0.88 (t, 3H, J = 6.7 Hz), 1.22 (s, 4H), 1.29 (s, 14H), 1.37–1.44 (m, 1H), 2.66–2.75 (m, 4H).

**NMR-<sup>13</sup>C (100 MHz, CDCl<sub>3</sub>)**  $\delta$ : 14.0, 22.5, 26.9, 29.2, 29.5, 29.7, 29.9, 31.8, 43.6 (2C), 43.7.

### Trivalent Amine:

**NMR-<sup>1</sup>H (400 MHz, CDCl<sub>3</sub>)**  $\delta$ : 0.88 (t, 3H, J = 7.0 Hz), 1.20 (s, brs, 10H), 1.32 (brs, 10H), 2.58 (s, 6H).

**NMR-<sup>13</sup>C (100 MHz, CDCl<sub>3</sub>)**  $\delta$ : 14.0, 22.5, 22.8, 29.2, 29.5, 30.6, 31.2, 31.7, 41.6, 44.7 (3C).

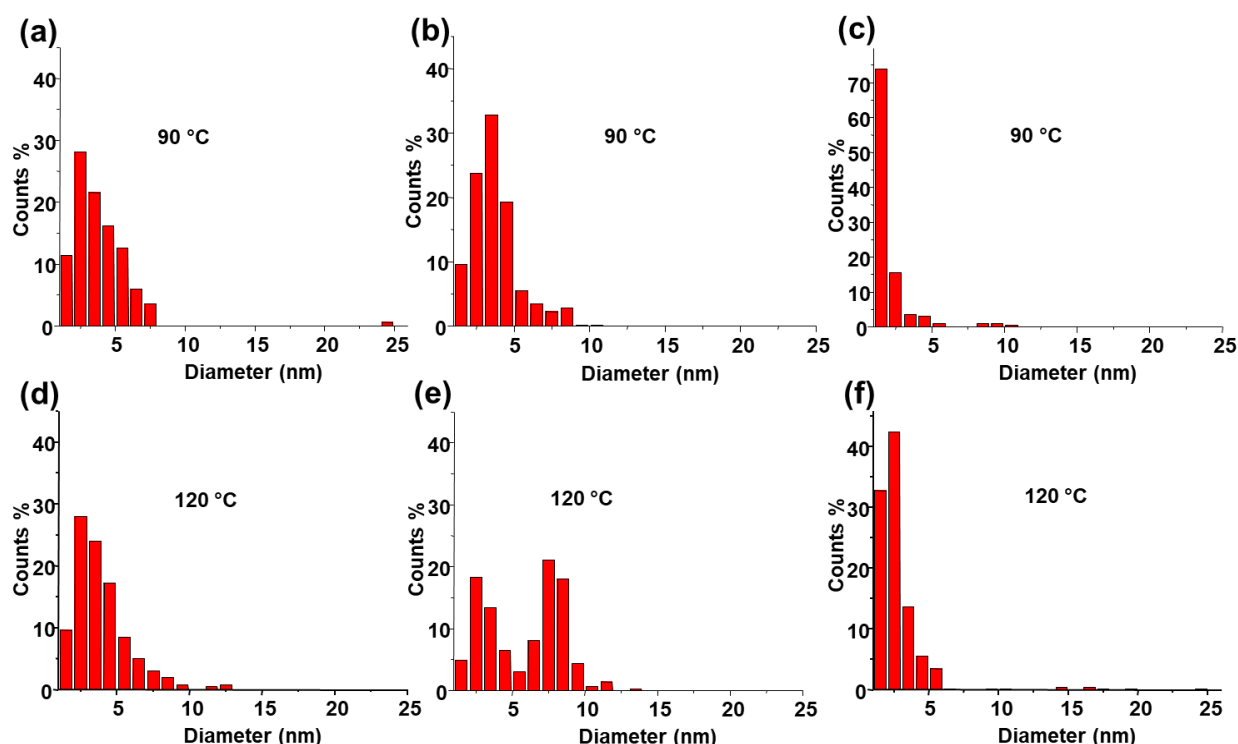

**Figure S1.** Histograms depict the size distribution of silver nanoparticles with monovalent ligands (M-AgNPs), silver nanoparticles with divalent ligands (D-AgNPs), and silver nanoparticles with trivalent ligands (T-AgNPs) at two different temperatures (90 °C (a-c) and 120 °C (d-f)), respectively.
